# Supplementary material for: Genomic Differences between Listeria monocytogenes EGDe Isolates Reveal Crucial Roles for SigB and Wall Rhamnosylation in Biofilm Formation
Source: PubMed Central journal article supplement (PMC7167478; doi:10.1128/jb.00692-19), 2020-03-11
Supplement: JB.00692-19-so001.pdf [file JB.00692-19-so001.pdf]

1 **Supplemental Material**

2 **Genomic differences between *Listeria monocytogenes* EGDe isolates reveals crucial roles**  
3 **for SigB and wall rhamnosylation in biofilm formation.**

4

5 Chih-Yu Hsu <sup>1</sup>, Lynne Cairns <sup>1#</sup>, Laura Hobley <sup>1,2#</sup>, James Abbott <sup>3</sup>, Conor O’Byrne <sup>4</sup>, Nicola  
6 R. Stanley-Wall <sup>1</sup>

7

8 <sup>1</sup> Division of Molecular Microbiology, School of Life Sciences, University of Dundee,  
9 Dundee, UK DD1 5EH

10 <sup>2</sup> Current address: School of Biosciences, University of Nottingham, Sutton Bonington  
11 Campus, Loughborough, Leicestershire, LE12 5RD

12 <sup>3</sup> Data Analysis Group, Division of Computational Biology, School of Life Sciences,  
13 University of Dundee, Dundee, UK DD1 5EH

14 <sup>4</sup> Bacterial Stress Response Group, National University of Ireland, Galway, Ireland.

15 # These authors contributed equally and are listed alphabetically by surname

16 **To whom correspondence should be addressed:**

17 Prof. Nicola R. Stanley-Wall

18 Division of Molecular Microbiology, School of Life Sciences, University of Dundee, Dundee  
19 DD1 5EH.

20 Email: [n.r.stanleywall@dundee.ac.uk](mailto:n.r.stanleywall@dundee.ac.uk)

21

22 Keywords: *Listeria monocytogenes*, biofilm formation, Sigma B, rhamnose, cell wall teichoic  
23 acid

24

25 **Materials and Methods**

26 **Synthetic DNA constructs**

27 The regions of DNA used to construct in frame deletions in *rsbU*, *sigB* and *lmo0184* were  
28 generated using DNA synthesis techniques. The sequences synthesised are detailed below  
29 where the underlined sequence indicated restriction sites.

30

31 For deletion of *rsbU* (pNW1454):

32 GGATCCGAGTACTTTCGCGCATGGACCTTGAAAGTGGTCTGGAAAACTTAAACAGGAATTGGGGGAATGAA  
33 CATGACATTCCAATCCTGTGTAAAGATAATTAATGAATGGGATATTGTAGCTGCAAGGCAACTAGGTAGAAAA  
34 ATATCCAAAGAAATTGGCTTTGGAACCGTTGACCAAGCAAGAATTACAACGCCATCAGTGAATTAGCTAGAA  
35 ATATTTTCTTTATGCTGGACGAGGAGAAATCTGTATCGAAAAAGTAAGTGAATCTGGCAAACAAGGTATGAT  
36 TATTGTTGCCAAAGACAAAGGTCCAGGTATTGTAGACATAAGAAAAGTAATGCAAGATGGTTATACAACATCA  
37 GGTGGTCTTGGAGCAGGTCTTCCAGGAGTCAAACGTTAATGGACAGTTTTGATATTGAATCCAGTATTGAAG  
38 GCGATTCTAAAGGAACGTAATTACAACAACGAAATGGGTTCCGTAAGGAGAGCTAGAAAAAATGGAACG  
39 AACTAAATAAGAAGAAGTGAAGACGTACCTCATTCTTTAGAGAGCATTTACTGGTGAGTAAACGTATTTAAAG  
40 AGTGGAGCGTTTTTATTTTTGAATGTTTTAATTTATTTGTTAGGGTAAAATCGACAGTATACTTAAAATTAGAT  
41 GGGGTGAAGTGATGAATATTAGTATAGAAATAAAAGAACGTGATACTGACCACATAGACATATTTGTTGCTG  
42 GGGAGATCGATGCTTATACAGCGCCAAAGGTAAGAAGCATTAGAAGTATATCAAGTTAAAGAGGGTATTG  
43 TACTTCGGATCGATTTAACAGAAGTGAGTTACATGGATAGCACCGGATTAGGCGTATTTGTAGGAGCTTTCAA  
44 AAGCTTACGTCAACGCCAAAGTGAACCTGTCTTGTGGTTAAGCGACCGACTTTTCCGATTGTTTGAATCA  
45 CAGGATTGTCAGATATCATCGAAATCAAAAATGTAGAGGGTGAAATGAATGGCAACAATAGATCT

46

47 For deletion of *sigB* (pNW1455):

48 GGATCCAATGTAGAGGGTGAAATGAATGGCAACAATGCATGACAAAATTACATTACAACCTCCTGCCAAGCCT  
49 GAATATGTAAGTTTAGGTAGACTTTTATTATCAGGAATTGCAAGTCGCGCAGGATTTTCTTATGAAGCAATTGA  
50 AGATTTGAAAATAGCTGTAAGTGAAGCCATCACTAATCCGTAAAGCATGCATTTAAAGGGGAAGAAGATGG  
51 CGAAATCACAGTCGAATATCTTATTTATGAAGATAAGCTAGAAGTTTCGTGTTTCCGATAACGGCACAAGCTTC  
52 GACTTAGAAACCCGTAACAAGAAATTGGCCATATGATGTGGGCGAGGATGCGGAGATGATGCGTATCGGT  
53 GGGCTAGGTTTATTTTAATTGAAACATTAATGGATGACGTGAAACTTTATTATGATGAAGGGGTTTCTGTCGT  
54 AATGACCAATATATTAATGAAAAGCAGGTGGAGGAGAATGCCAAAAGTATCTCAACCTGATAAAGAGCAGA  
55 ATGAGGAAGTGGAGTAAATGAACAAGGCAGTTGAATCAAATAATTTATTTGATTTCAACGTTCTAAAGCATT  
56 ACAACAATACTGCGGGGATGTTTATTATACCCATGAAGACGAAAATGGTTTTCTGTATGTTCTTTCTGATGGAC  
57 TTGGAAGTGGGCTCGAAGCTAATAGAGCGGCCAAAGCGACTGTTGACGCCATAAAGAAGATATTCATGCAG  
58 ATATTACTGATATGCTTGAAAAAGCGAACCAGGCTGTTTCAGGGCTTCGTGGTGCTGCGATAGCTATTATTAA  
59 AGGTGACTACTTAACGAAGACACTTTATTATACTGGTATGGGTAATATTCGTTTTTATATGATTGGGATTGAAG  
60 ATAAGCTTATTTTCCGCTTTCAGGCTCTGGATTTTTGTCCGTCGAAAACAGAAATATCGGTTGCAATCGTTTA  
61 AATATAAACAGACAGTAAGTTTTAATGCATTCAGATGGACTTGTTCTTTCTCGAGATCT

62

63 For deletion of *lmo0184* (pNW1451):

64 GGATCCTAATTCAAGTAAACGATCAATTTATGCTTGGTGAATAATCCTCGTTGCGCCAATCGTTGCGAAGGC  
65 CAAGCGAAGCGCTAGTTTCGTTTACCAAAGGGCTTTGGTTAATTATTGGACAAAAGAGCAGTTTCGTGGGCG  
66 GCGACTATATTATCGCAGACGCGCCGATTGATACCATGCCAATTTACATTAAGCAGGAACAATTCTGCCAGTT  
67 GGTAGCAGCGTTCAAATAACAAAAGAGACGCAAGAATTGACATTAGAAGTTTACTTAGACAGTGAGACAGCA

68 ACTGGTTACGTGTATAATGATGATGGGAAAAGTTACCAATATGAAAGTGGCGCAGTATCCAAAACAACACTCA  
69 CAGCTACTTTCAAAAATGGCGAAGTACTAATAAATGCTACCCATCAAGGTGAAGCAAAGTTCAGCAAAAAGT  
70 AACTACTATAACAAGTGTGGAGAAAAAATAGACAAAATTACAAGGGCGGGAATTTAATCGATGAAACAAAT  
71 CAAGTAAATCTCAGGAAAGCCACCATTTGCTAGGTGGCTTTTTTTGTATGCATCAAAAATTATAGTATAATAGA  
72 AGGAAATGATTTTATTAGGAGGAATTCTCTTGCTATTTGATACGCATGTACACCTTAATGACGAGGCTTTTGAT  
73 GATGATATAGAAGAAGTAATAAAACGCGCGCAGGAAAACGATGTGACTCGTATGGCCGTGGTGGGCTTTAAT  
74 AAAGAAACAATTGACCGGGCGCTTGAATTAGCGGAGAAATATGATTTTATCTCATTAAATCGTCGGCTGGCATC  
75 CCACAGACGCTATTACCTTTACAGACGAAGATTTAGAATGGCTTCGTGATTTAGCACTGACACACCCAAAAGT  
76 AGTTGCTTTAGGCGAAATGGGCTTAGATTATCACTGGGATACTTCGCCAAAAGAAACGCAATTCGAGGTTTTT  
77 AGAAAACAAATCCGTTTAGCGAAAGAAGTGAATTTACCGATAGTTATTCACAACCGAGATCT

78

79

80 Table S1: Strains used in this study

| <b>Strains</b>     | <b>Genotype</b>                                  | <b>Source/ Other names /Reference</b>     |
|--------------------|--------------------------------------------------|-------------------------------------------|
| WT <sub>1030</sub> | EGDe (stocked as LWS1030)                        | ANG882                                    |
| WT <sub>1031</sub> | EGDe (stocked as LWS1031)                        | ANG873                                    |
| WT <sub>1032</sub> | EGDe (stocked as LWS1032)                        | University College Cork                   |
| WT <sup>1033</sup> | EGDe (stocked as LWS1033)                        | ATCC                                      |
| DH-L1042           | EGDe $\Delta$ <i>flaA</i> (stocked as LSW1035)   | DH-L1042 (Grundling <i>et al.</i> , 2004) |
| LSW1024            | WT1031 $\Delta$ <i>lmo0184</i>                   | This work                                 |
| LSW1026            | WT1031 $\Delta$ <i>sigB</i>                      | This work                                 |
| LSW1028            | WT1031 $\Delta$ <i>rsbU</i>                      | This work                                 |
| LSW1039            | WT1031 $\Delta$ <i>rmlT</i>                      | This work                                 |
| LSW1040            | WT1031 $\Delta$ <i>rmlA</i>                      | This work                                 |
| LSW1051            | WT1031 $\Delta$ <i>rmlA</i> $\Delta$ <i>rsbU</i> | This work                                 |

81

82

83 Table S2: Plasmids used in this study

| <b>Plasmid</b> | <b>Description</b>                                                   |
|----------------|----------------------------------------------------------------------|
| pUC19          | Intermediate cloning vector                                          |
| pUC57          | Intermediate cloning vector                                          |
| pMAD           | Vector for constructing in-frame deletion in <i>L. monocytogenes</i> |
| pNW1451        | pUC57 $\Delta$ <i>lmo0184</i>                                        |
| pNW1454        | pUC57 $\Delta$ <i>rsbU</i>                                           |
| pNW1455        | pUC57 $\Delta$ <i>sigB</i>                                           |
| pNW1457        | pMAD $\Delta$ <i>rsbU</i>                                            |
| pNW1458        | pMAD $\Delta$ <i>sigB</i>                                            |
| pNW1459        | pMAD $\Delta$ <i>lmo0184</i>                                         |
| pNW1901        | pUC19 $\Delta$ <i>rmlA</i>                                           |
| pNW1904        | pUC19 $\Delta$ <i>rmlT</i>                                           |
| pNW1905        | pMAD $\Delta$ <i>rmlT</i>                                            |
| pNW1907        | pMAD $\Delta$ <i>rmlA</i>                                            |

84

85

86 Table S3: Primers used in this study

| Primer  | Sequence (5'-3') <sup>a</sup>         | Use                                 |
|---------|---------------------------------------|-------------------------------------|
| NSW2027 | AGTGGTTTGCCGCTCGTTCG                  | Screening<br>for<br><i>Δlmo0184</i> |
| NSW2028 | AATTCCGCCTACTTCTTCGG                  |                                     |
| NSW2030 | GTAAGTGGGATACAGCCAGC                  | Screening<br>for <i>ΔrsbU</i>       |
| NSW2031 | ACATATTCAGGCTTGGCAGG                  |                                     |
| NSW2032 | TTGTTTGGTTTAAGCGACCG                  | Screening<br>for <i>ΔsigB</i>       |
| NSW2033 | CACAAAGTGGTGATTCTAGG                  |                                     |
| NSW2301 | CTTGGTGAATTCGACTATGATAATATCAAATTTAC   | Construct<br>for <i>ΔrmlT</i>       |
| NSW2302 | TTTGGTACCTCTCATTATATCCTCCTAAAATAGATT  |                                     |
| NSW2303 | AAAGGTACCCTTTAAGAATGGAGAGAAAAGAATGAA  |                                     |
| NSW2304 | CGATTAGTCGACAAATAAAGACCAGTTACCGCATAA  |                                     |
| NSW2305 | GTCGGCTAAGGTTTCAGCAA                  | Screening<br>for <i>ΔrmlT</i>       |
| NSW2306 | GCTCAAAGCGTGGAGTATCT                  |                                     |
| NSW2307 | CAAATCCTGCAGGCCAAAAGAATTCCTTTGATTATAG | Construct<br>for <i>ΔrmlA</i>       |
| NSW2308 | AATGGTACCTTTCATTCTTTTCTCTCCATTCTTAAA  |                                     |
| NSW2309 | TTAGGTACCAAATAAGAAGAGTGAGGCGTACTAATG  |                                     |
| NSW2310 | GATATCGTCGACATTGCTCATTGTGCCTGCATAAGT  |                                     |
| NSW2311 | CAAGTCACCGAGCATTAACC                  | Screening<br>for <i>ΔrmlA</i>       |
| NSW2312 | CGGATCATCGTAGGCAATTC                  |                                     |
| NSW2325 | GATTTTATGCTAACTCATTGGTATCGCTCACGAG    |                                     |
| NSW2328 | GCGGGATTAATTTTCTGGGAAATGATGTGGTCC     |                                     |
| NSW2322 | CGTAGGATCGATCCGATCCT                  | Sequencing<br>pMAD                  |
| NSW817  | CGTCATCTACCTGCCTGGA                   |                                     |
| NSW2323 | CTAAAGTTAATGGCAAAGCTCCTGCAAATTAACG    | Screening<br>for <i>ΔrmlT</i>       |
| NSW2324 | CTTCAACAATTTCCATTAGTACGCCTCACTCTTC    |                                     |

87 a. The underlined sequences are restriction sites used for cloning purposes.

88

89

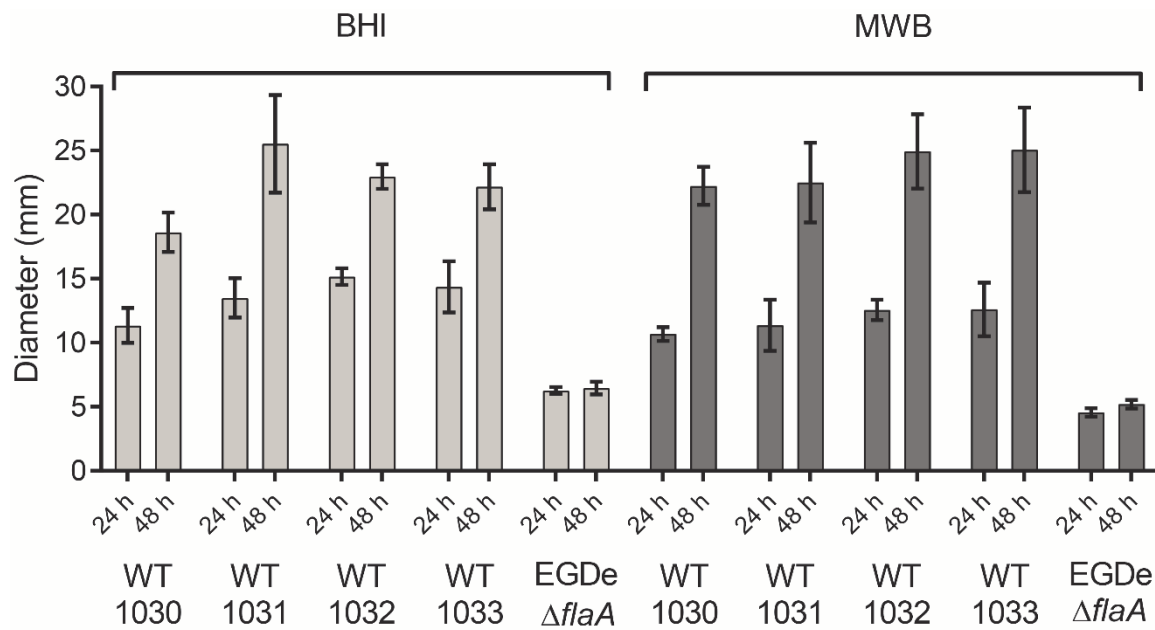

90

91 **Figure S1: Quantification of motility of the four EGDe isolates.** Quantification of motility  
 92 of the four isolates assessed after 24 and 48 hours at 30°C using BHI or MWB medium  
 93 (representative images shown in Figure 1). The EGDe  $\Delta flaA$  strain was used as a negative  
 94 control.

95

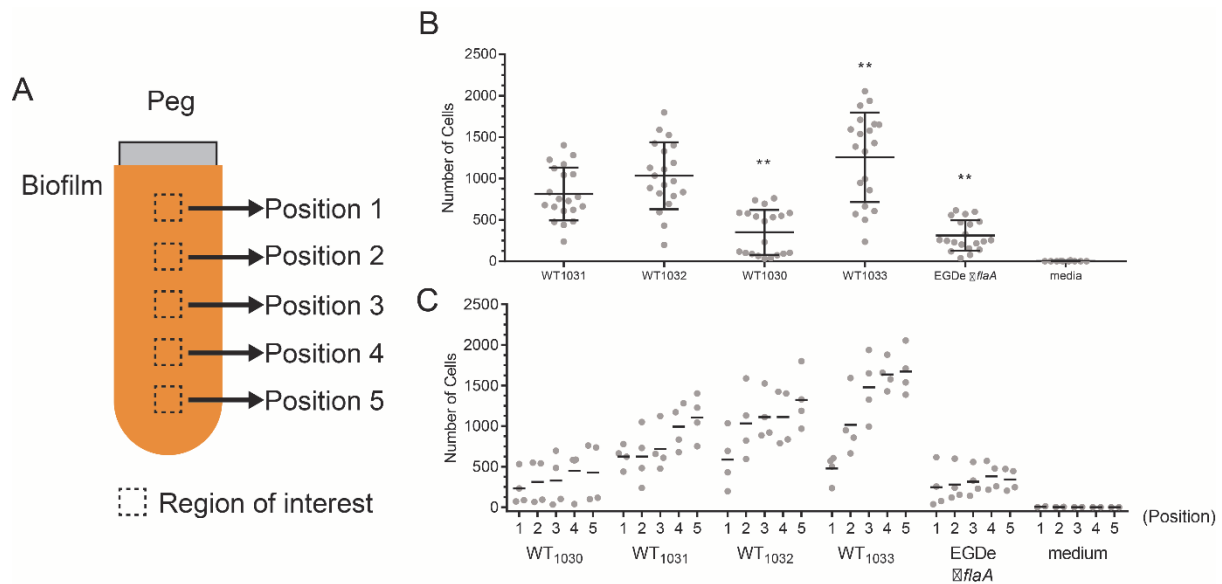

96

97 **Figure S2: Quantification of cell adherence of the four EGDe isolates.** The biomass  
 98 adherent to the substratum was imaged using scanning electron microscopy. Representative  
 99 image are shown in Figure 3. The number of cells adherent were quantified for all of the  
 100 images taken. **(A)** Schematic of the imaging process showing the positions used to capture  
 101 the images. **(B)** The mean number of cells per field of view adherent to the substratum for  
 102 each of the strains is presented. The error bars represent the standard deviation. The data were  
 103 analysed by one-way ANOVA comparing with WT1031 with “\*\*” representing a  $p$  value of  
 104  $\leq 0.01$  **(C)** the same data presented in **(B)** are shown with respect to the image capture  
 105 position. The bar represents the mean value for each position and strain.

106



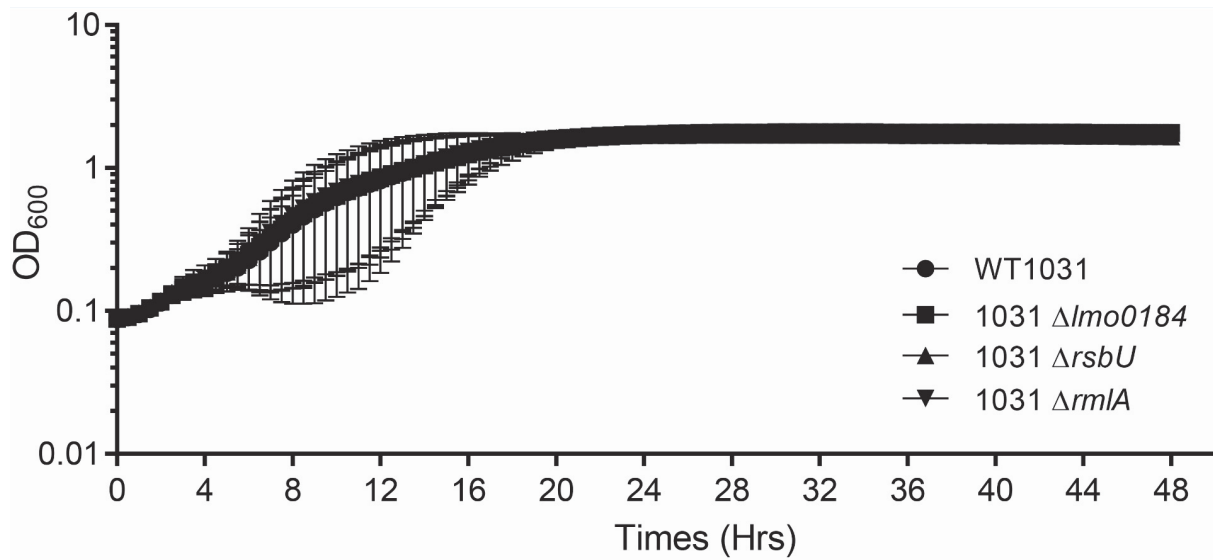

107

108 **Figure S3: Analysis of growth of the single deletion strains.** Growth in MWB medium for  
 109 strains WT<sub>1031</sub>, WT1031  $\Delta$ *lmo0184* (LSW1024), WT1031  $\Delta$ *rsbU* (LSW1028), WT1031  
 110  $\Delta$ *rmlA* (LSW1040) was assessed at 30°C without shaking. The value presented is the mean of  
 111 2 independent experiments and the error bars represent the standard deviation.

112

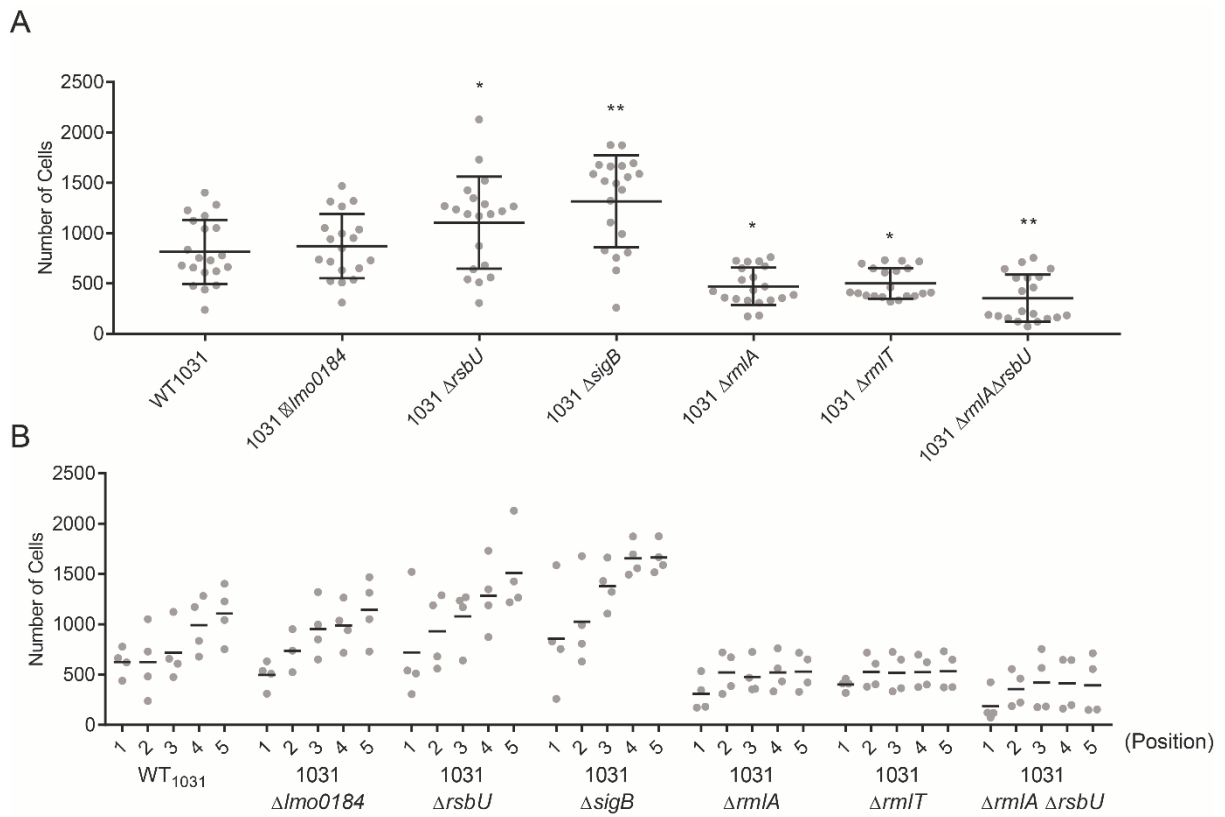

113

114

115

116

117

118

119

120

121

122

123

124

**Figure S4: Quantification of cell adherence determined using scanning electron microscopy.** The biomass adherent to the substratum was imaged using scanning electron microscopy. Representative images are shown in Figures 3, 4 and 5. The number of cells adherent were quantified for all of the images taken. A schematic of the imaging process showing the positions used to capture the images is shown in Figure S2A; **(A)** The mean number of cells adherent to the substratum for each of the strains is presented. The error bars represent the standard deviation. The data were analysed by one-way ANOVA comparing with WT1031 with “\*” representing a  $p$  value of  $\leq 0.05$  and “\*\*” representing a  $p$  value of  $\leq 0.01$ ; **(B)** the same data presented in **(A)** are shown with respect to the image capture position. The bar represents the mean value for each position and strain.

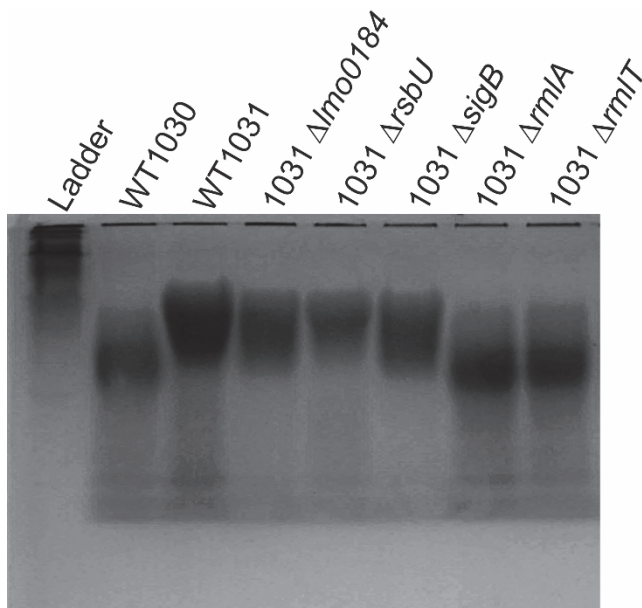

125

126 **Figure S5: Cell wall extraction of *L. monocytogenes* EGDe mutant strains.** Cell wall  
 127 material was extracted from WT<sub>1030</sub>, WT<sub>1031</sub>, WT1031  $\Delta$ *lmo0184* (LSW1024), WT1031  
 128  $\Delta$ *rsbU* (LSW1028), WT1031  $\Delta$ *sigB* (LSW1026), WT1031  $\Delta$ *rmlA* (LSW1040) and WT1031  
 129  $\Delta$ *rmlT* (LSW1039), analysed by 20% (w/v) native-PAGE and visualised by staining with  
 130 alcian blue.

131

132

133 **Supplemental References**

134 **Grundling, A., Burrack, L. S., Bouwer, H. G. & Higgins, D. E. (2004).** *Listeria monocytogenes*  
135 regulates flagellar motility gene expression through MogR, a transcriptional repressor required for  
136 virulence. *Proceedings of the National Academy of Sciences of the United States of America* **101**,  
137 12318-12323.

138

139

140
